# Supplementary material for: Increased cardiovascular mortality associated with gout: a systematic review and meta-analysis
Source: PubMed Central journal article supplement — Eur J Prev Cardiol. 2015 Mar;22(3):335–43. doi: 10.1177/2047487313514895 (PMC4361356; doi:10.1177/2047487313514895), 2015-03
Supplement: SearchStrategyOnlineSupplementTableEJPC.pdf [file SearchStrategyOnlineSupplementTableEJPC.pdf]

**Search Strategy (Online Supplement)**

|         | Search Term                                                             |                                            |                          |
|---------|-------------------------------------------------------------------------|--------------------------------------------|--------------------------|
| Row No. | Cardiovascular Disease                                                  | Gout                                       | Mortality                |
| 1.      | Exp MYOCARDIAL ISCHEMIA/                                                | Exp GOUT/                                  | Exp MORTALITY/           |
| 2.      | Exp CARDIOVASCULAR DISEASES/                                            | Gout*.ti,ab                                | Mortality.ti,ab          |
| 3.      | Exp CORONARY DISEASE/                                                   |                                            |                          |
| 4.      | (Heart and disease*).ti,ab                                              |                                            |                          |
| 5.      | (Coronary and disease*).ti,ab                                           |                                            |                          |
| 6.      | Chd.ti,ab                                                               |                                            |                          |
| 7.      | Cardiovascular.ti,ab                                                    |                                            |                          |
| 8.      | Angina.ti,ab                                                            |                                            |                          |
| 9.      | Cvd.ti,ab                                                               |                                            |                          |
| 10.     | Exp MYOCARDIAL INFARCTION/                                              |                                            |                          |
| 11.     | (myocardial and infarction).ti,ab                                       |                                            |                          |
| 12.     | Exp ATHEROSCLEROSIS/                                                    |                                            |                          |
| 13.     | Atherosclero*.ti,ab                                                     |                                            |                          |
| 14.     | (Heart and attack).ti,ab                                                |                                            |                          |
| 15.     | 1 OR 2 OR 3 OR 4 OR 5 OR 6 OR 7 OR 8 OR 9 OR 10 OR 11 OR 12 OR 13 OR 14 | 1 OR 2 AND Cardiovascular disease (row 15) | 1 OR 2 AND Gout (row 15) |
